# Supplementary material
Source: publisher figshare collection journal article supplement (https://tandf.figshare.com/ndownloader/files/25468430)
Supplement: Supplementary file 1 [file 25468430]

**Appendix 2.** Internal consistency, examined using Cronbach’s alpha, for all themes, for both rating questions (participant groups separately).

| **Concepts** | **Perceived benefit of the approaches** | | **Likely use of the approaches** | |
| --- | --- | --- | --- | --- |
| **Audiologists (n = 19)** | **Adults with hearing loss (n = 52)** | **Audiologists (n = 19)** | **Adults with hearing loss (n = 52)** |
| 1. Including Communication Partners (6 items) | 0.692 | 0.906 | 0.905 | 0.879 |
| 2. Promoting Client Responsibility (5 items) | 0.638 | 0.712 | 0.699 | 0.711 |
| 3. Use of Strategies and Training to Personalise the Rehabilitation Program (13 items) | 0.777 | 0.927 | 0.837 | 0.918 |
| 4. Facilitating Peer and Other Professional Support (12 items) | 0.846 | 0.959 | 0.966 | 0.943 |
| 5. Improving Social Engagement with Technology (7 items) | 0.747 | 0.853 | 0.813 | 0.862 |
| 6. Providing Emotional Support (11 items) | 0.834 | 0.892 | 0.848 | 0.906 |
| 7. Client Empowerment (12 items) | 0.799 | 0.935 | 0.873 | 0.926 |
